# Supplementary material
Source: publisher site journal article supplement (https://www.spandidos-publications.com/2735/downloadSupplementary)

Figure S1. Cell growth and MMP-1 expression are inhibited by specific PDGFR- $\alpha$  and - $\beta$  antibodies in ER<sup>+</sup> breast cancer cell lines. (A) Cell growth by specific PDGFR- $\alpha$  and - $\beta$  antibodies was analyzed by colony formation assay. (B) Levels of MMP-1, t-, p-ERK and STAT-3 expression were analyzed by Western blotting. Levels of MMP-2 expression was analyzed by zymography. Results are representative of three independent experiments. Values are represented as the mean  $\pm$  standard error of the mean. \*P<0.05 vs. Con. MMP, matrix metalloproteinase; ER<sup>+</sup>, estrogen receptor-positive; PDGFR, platelet-derived growth factor receptor; Con, control.

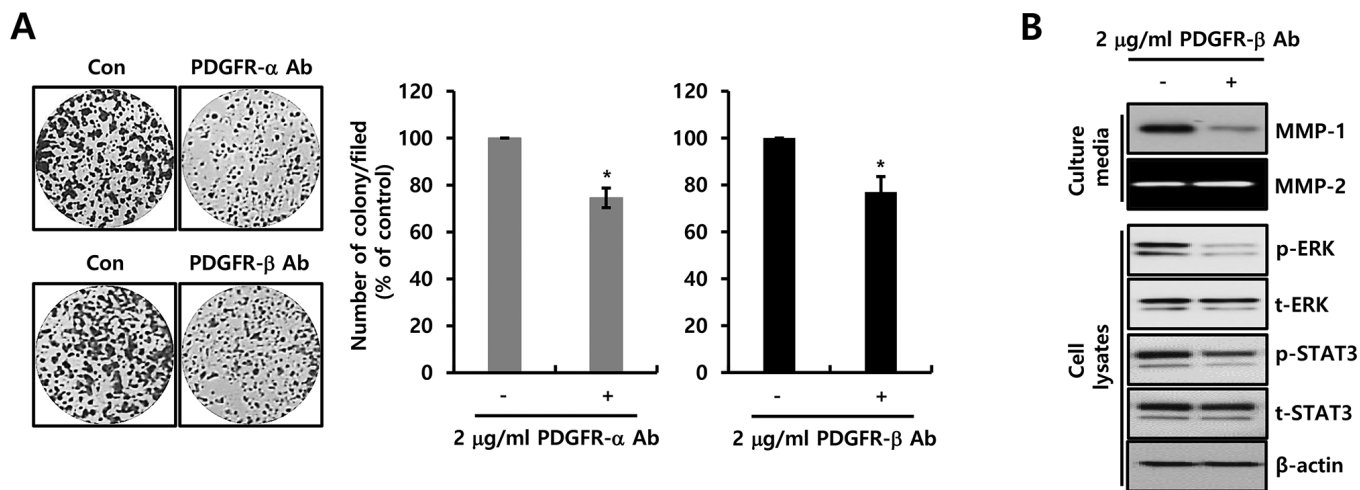

Supplement: Supplementary file 1 [file downloadSupplementary]
